# Supplementary material for: Antigen Delivery to DEC205+ Dendritic Cells Induces Immunological Memory and Protective Therapeutic Effects against HPV-Associated Tumors at Different Anatomical Sites
Source: PubMed Central journal article supplement (PMC8326119; doi:10.7150/ijbs.57038), 2021-07-13
Supplement: ijbsv17p2944s1.pdf [file ijbsv17p2944s1.pdf]

## **SUPPLEMENTARY MATERIAL**

### **Materials and methods**

*Cytokine Beads Array (CBA)*. Spleen were collected 7 or 14 days after the last immunization. Cells were incubated at a concentration of  $1.5 \times 10^6$  cells per well and stimulated overnight at 37°C in the presence of 2 µg/mL anti-CD28 antibody (BD Biosciences, USA) and 1.5 µg/mL E7-specific RAHYNIVTF peptide (amino acids 49–57) at a final concentration of 300 ng/well. After 12 hour of incubation, the levels of IFN $\gamma$  in cell culture supernatants were analyzed using a cytometric bead array kit (CBA) (Mouse Th1/Th2/Th17 Cytokine Kit, Becton Dickinson, San Jose, CA). The samples were run on an LSRFortessa® flow cytometer (BD Bioscience, USA) acquired and analyzed using FCAP array software (BD Biosciences).

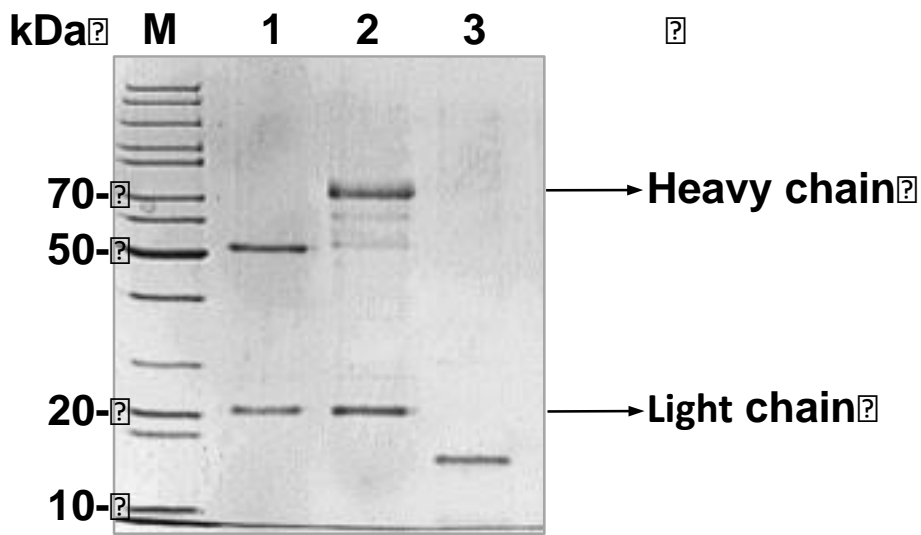

**Figure S1. SDS-PAGE gel electrophoresis of  $\alpha$ DEC205-E7 mAbs.** The mouse anti-DEC205 mAb, anti-DEC205 fused to E7 protein and E7 protein were run on 12% SDS-PAGE under reducing conditions and stained with Coomassie Blue. The heavy (HC) and light (LC) chains of the following antibodies are shown as indicated in the figure. Line 1:  $\alpha$ DEC205, line 2:  $\alpha$ DEC205-E7, line 3: E7. M: molecular weight marker.

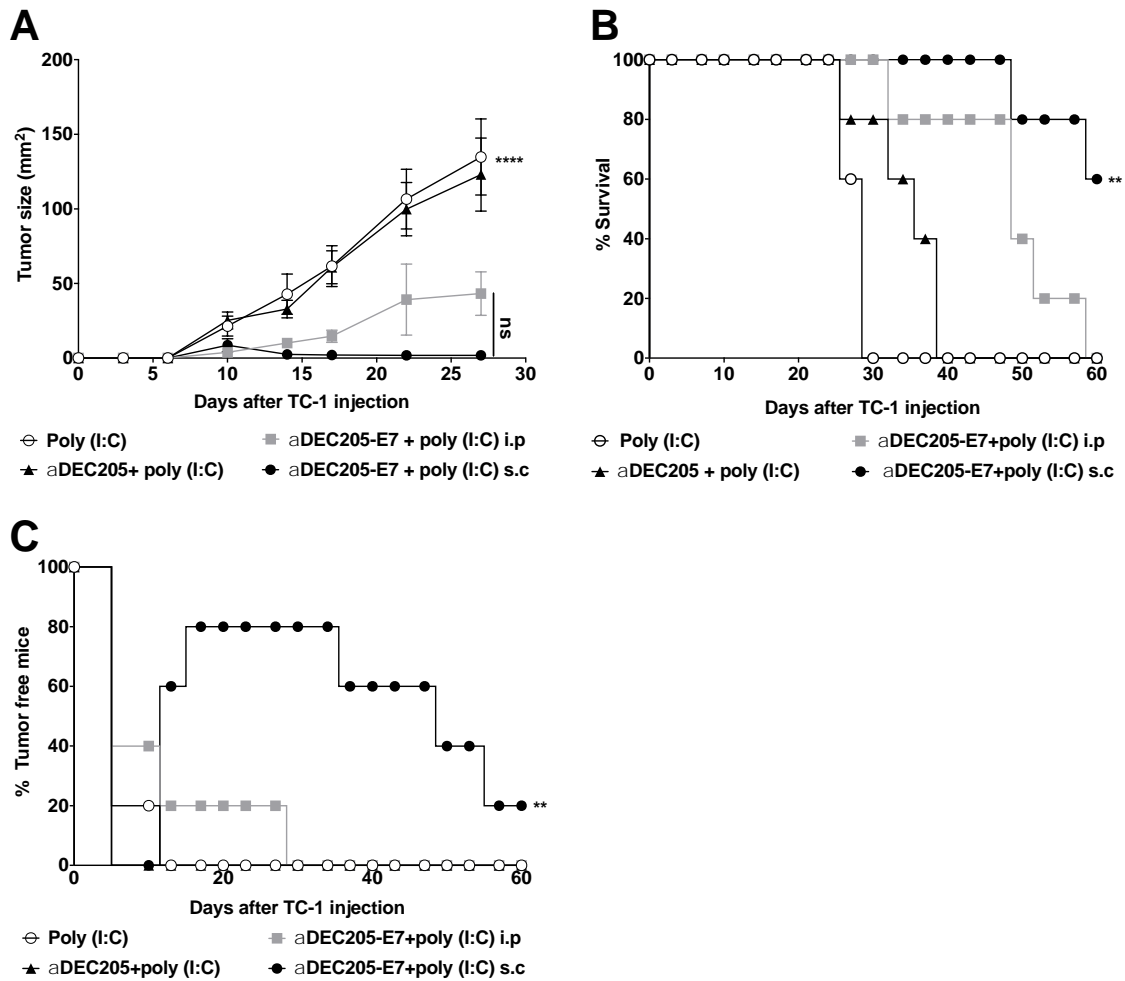

**Figure S2. Subcutaneous administration of  $\alpha$ DEC205-E7 promotes better antitumor effects than intraperitoneal route in TC-1 model.** C57BL/6 mice were grafted with  $2.4 \times 10^5$  TC-1 cells subcutaneously on the right flank and immunized 3 and 10 days later with  $10 \mu\text{g}$   $\alpha$ DEC205-E7 mAbs in the presence of  $50 \mu\text{g}$  poly (I:C) by intraperitoneal (i.p) or subcutaneous (s.c) routes. As control group, mice were immunized with two doses of the  $\alpha$ DEC205 plus poly (I:C) or poly (I:C) alone intraperitoneally. Tumor growth was monitored 2–3 times per week for a period of 60 days (A) Estimated tumor size over time (B) Percentage of survival or (C) Percentage of tumor-free mice over time (log-rank–Mantel–Cox). Experiments were reproduced two times. (n=5) \*\*p< 0.01, \*\*\*\*p< 0.0001, ns =Non-significant.

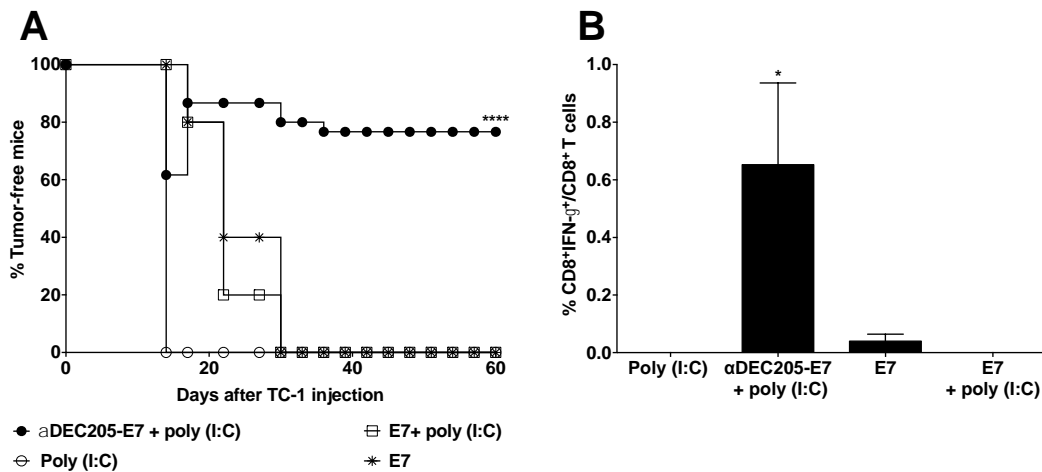

**Figure S3. Antitumor effects of  $\alpha$ DEC205-E7 in mice s.c. transplanted with TC-1 cells.** (A) Anti-tumor therapeutic effects measured in mice transplanted with TC-1 cells. For C57BL/6 mice immunized with E7 or E7 plus poly (I:C) the animals were challenged with  $7.5 \times 10^4$  TC-1 cells, and subsequently treated with two s.c doses (days 1 and 8 after challenge) containing  $30 \mu\text{g}$  of E7 and  $50 \mu\text{g}$  of poly (I:C) ( $n=5$ ). For mice immunized with  $\alpha$ DEC205-E7, animals were challenged with  $10^5$  TC-1 cells, and subsequently treated with two s.c doses (days 3 and 10 after challenge) containing  $10 \mu\text{g}$  of  $\alpha$ DEC205-E7 mAb admixed with  $50 \mu\text{g}$  of poly (I:C) ( $n=7$ , log-rank–Mantel–Cox). (B) Induction of IFN- $\gamma$ -producing E7-specific CD8 $^+$  T cell responses in mice treated with  $\alpha$ DEC205-E7. The same mouse groups described in (a) were bled 7 days after the last vaccine dose and analyzed by flow cytometry as reported in M&M. Experiments were reproduced three times. Statistical significance was determined by one-way ANOVA. \* $p < 0.05$ , \*\*\*\* $p < 0.0001$ .

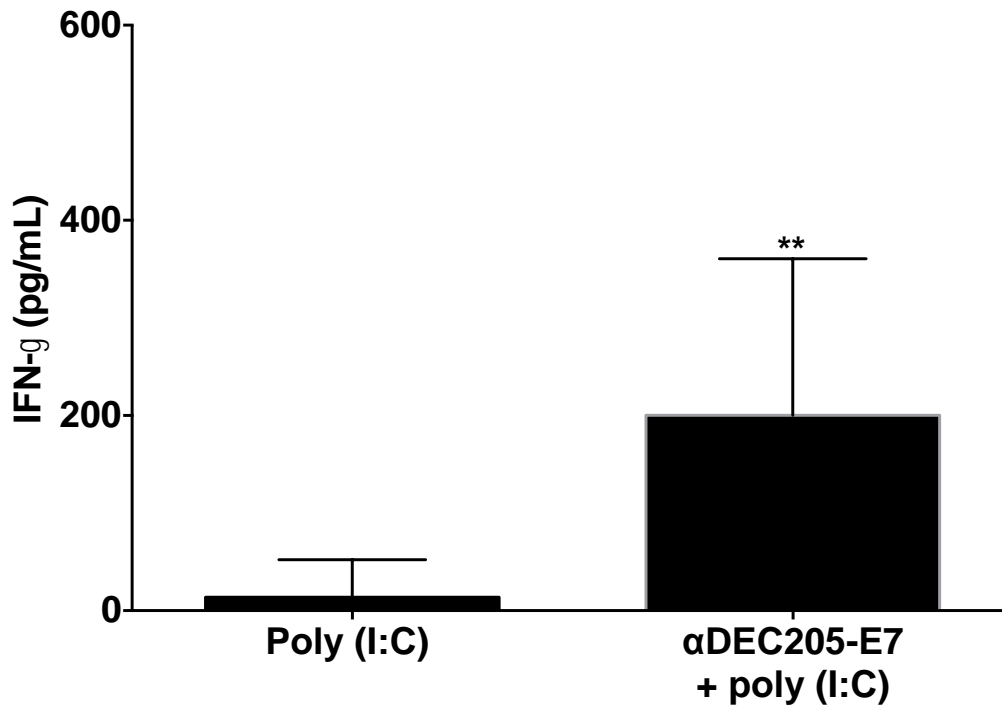

**Figure S4. Detection of IFN $\gamma$ -secreted by splenocytes stimulated with an MHC class I-restricted E7-specific epitope.** C57BL/6 mice were engrafted in the right flank with  $10^5$  TC-1 cells (day 0) and s.c. immunized at days 3 and 10 with 10  $\mu$ g of  $\alpha$ DEC205-E7 mAb admixed with poly (I:C). An additional mouse group was immunized with only poly (I:C). Splenocytes were collected 7 days after the last immunization and stimulated with a synthetic peptide corresponding to the E7 peptide overnight. IFN $\gamma$ -secreted was determined by Cytometric Bead Array (CBA). Analyses were performed using FCAP array software. (n=9). Statistical significance was determined by t-test. \*\*p < 0.01.

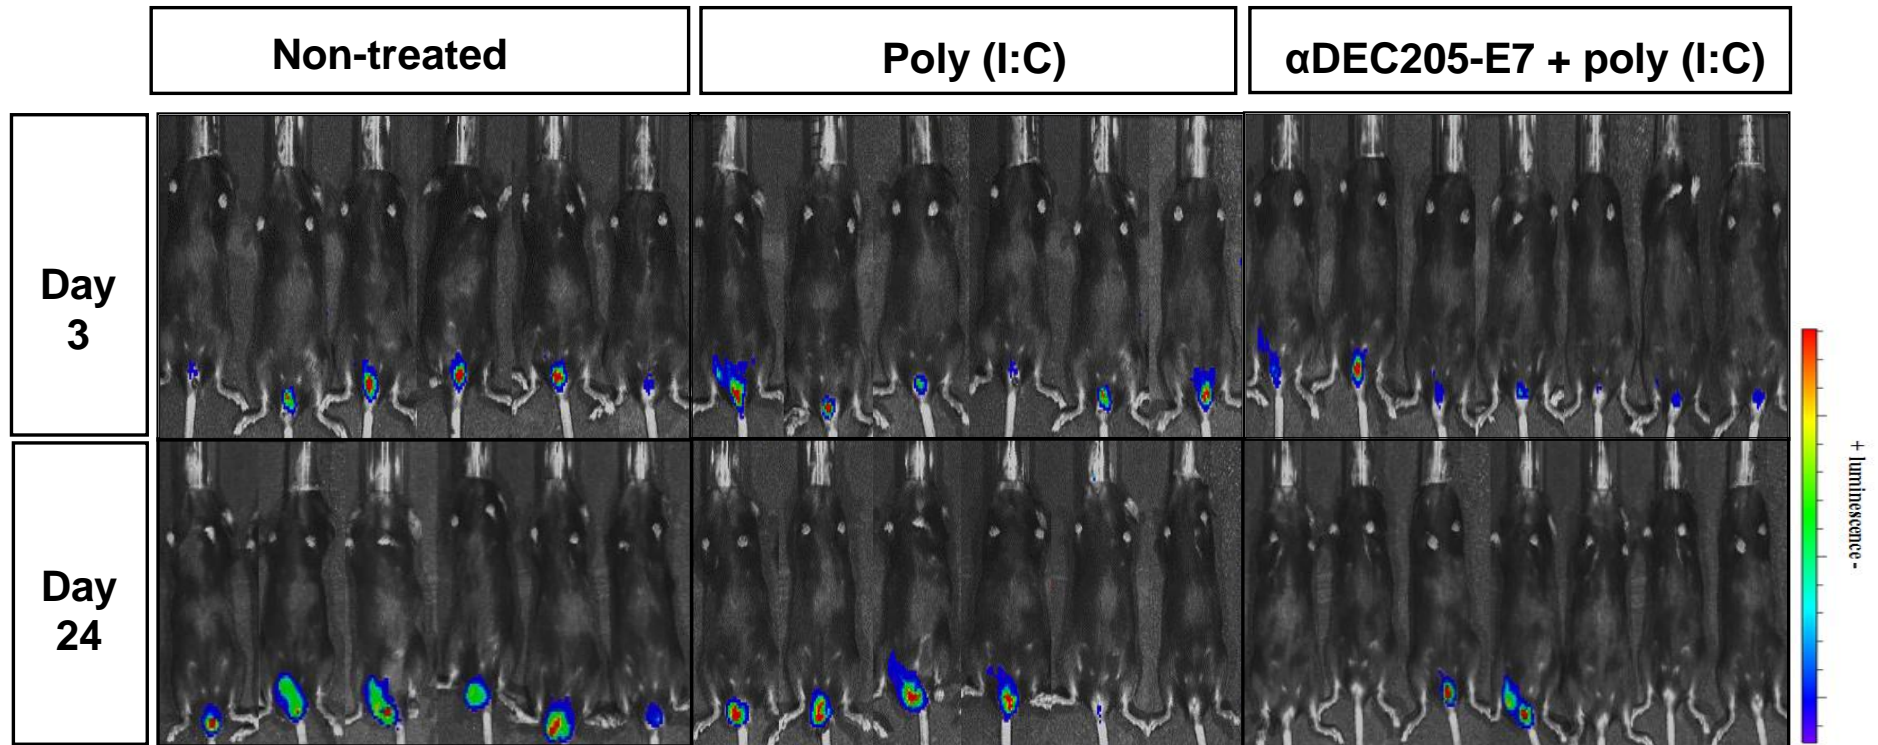

**Figure S5. Immunization with the  $\alpha$ DEC205-E7 mAb induces therapeutic antitumor effects in mice transplanted with TC-1 luc cells at in the genital mucosa.** Female C57BL/6 mice received medroxyprogesterone acetate (3 mg/mouse) and, 4 days later, were engrafted with  $10^5$  TC-1-luc cells in the genital mucosa. Three and 10 days later, the animals were s.c immunized with 10  $\mu$ g of  $\alpha$ DEC205-E7 mAb admixed with poly (I:C). Tumor protection was evaluated once a week by bioluminescence measurement (p/sec/cm<sup>2</sup>/sr) and images are representative from two experiments after luciferase activity 5 min after luciferin injection.

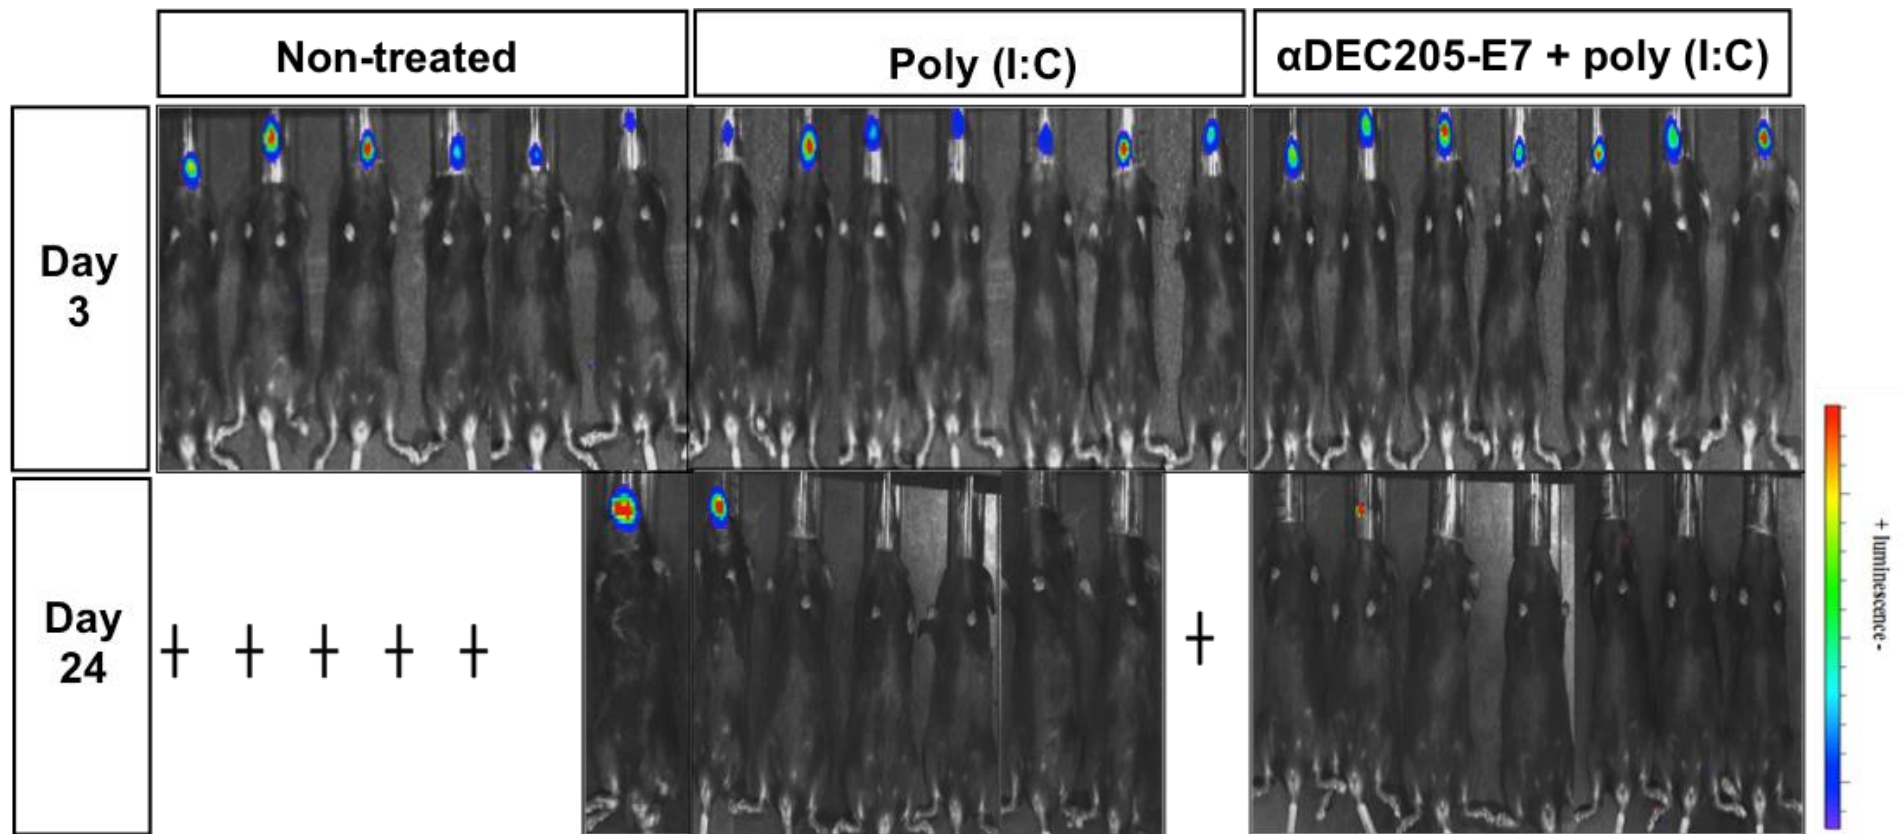

**Figure S6. Immunization with the  $\alpha$ DEC205-E7 mAb induces therapeutic antitumor effects in mice transplanted with TC-1 cells at tongue.** C57BL/6 mice were engrafted with  $5 \times 10^4$  TC-1-luc cells in the tongue and s.c immunized 3 and 10 days later with 10  $\mu$ g of  $\alpha$ DEC205-E7 mAb admixed with poly (I:C) or treated with only poly (I:C). Tumor protection was evaluated once a week by bioluminescence measurement (p/sec/cm<sup>2</sup>/sr) and images are representative from two experiments after luciferase activity 5 min after luciferin injection.

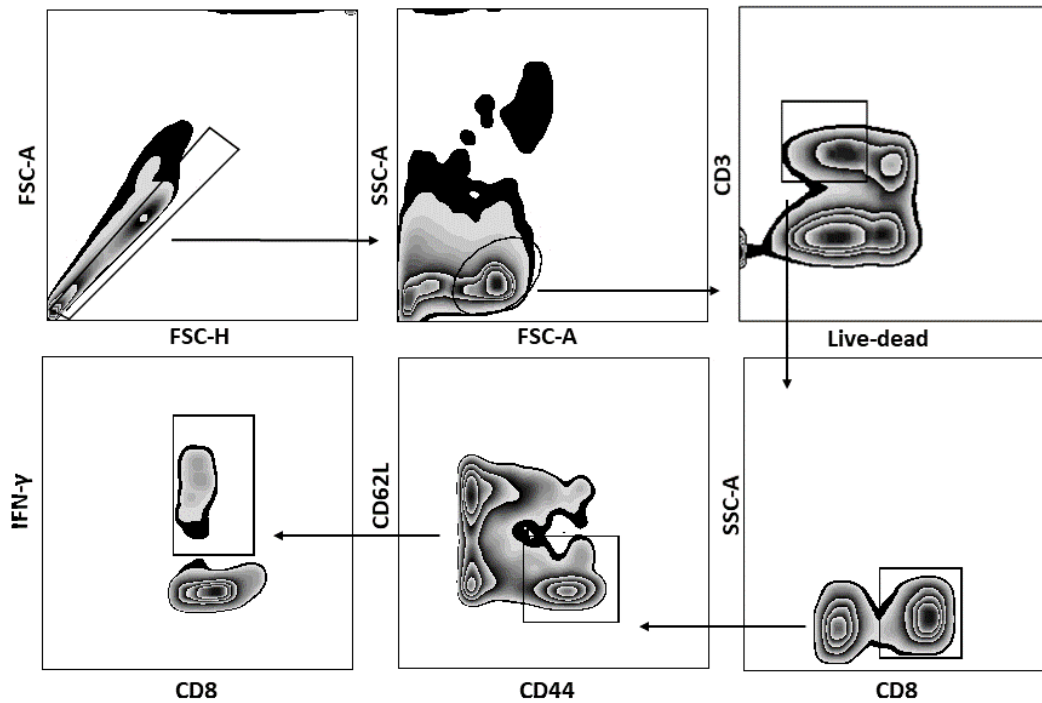

**Figure S7. Gating strategy for the evaluation of IFN $\gamma$ -production by effector memory CD8<sup>+</sup>T cells in blood.** Mice were reinjected with  $5 \times 10^5$  TC-1-luc in the tongue as described in Figure 5. After seven days, blood cells were collected and stimulated in vitro overnight with a peptide from E7 corresponding to the K<sup>b</sup> MHC class I-restricted epitope. The gating strategy is shown: single cells, size x granulosity, live cells<sup>+</sup> x CD3<sup>+</sup>, size x CD8<sup>+</sup>, CD44<sup>+</sup> x CD62L<sup>-</sup> and CD8<sup>+</sup> x IFN- $\gamma$ <sup>+</sup>. Analyses were performed using FlowJo software.
